# Supplementary material for: Habitat degradation negatively affects auditory settlement behavior of coral reef fishes
Source: PubMed Central journal article supplement — Proc Natl Acad Sci U S A. 2018 Apr 30;115(20):5193–8. doi: 10.1073/pnas.1719291115 (PMC5960293; doi:10.1073/pnas.1719291115), 2018-04-30
Supplement: pnas.1719291115.sd01.pdf [file pnas.1719291115.sd01.pdf]

1 **Dataset S1.** Assigned trophic guilds by taxonomic group. Rows in bold font are groups that were  
 2 used in analyses; subsequent rows in regular font are those from the Lizard Island Field Guide  
 3 (<http://lifg.australianmuseum.net.au>) that were used to assign trophic guilds to genera and  
 4 families that were not identified to species. Where no trophic classification is given, no  
 5 information was found for that species. Guilds assigned based on published literature (41–47)  
 6 and FishBase (48), following ref. 49.

| <b>Taxonomic group</b>                         | <b>Trophic classification</b> |
|------------------------------------------------|-------------------------------|
| <b><i>Pomacentrus adelus</i></b>               | <b>Herbivore</b>              |
| <b><i>Pomacentrus amboinensis</i></b>          | <b>Omnivore</b>               |
| <b><i>Pomacentrus bankanensis</i></b>          | <b>Herbivore</b>              |
| <b><i>Pomacentrus brachialis</i></b>           | <b>Herbivore</b>              |
| <b><i>Pomacentrus chrysurus</i></b>            | <b>Herbivore</b>              |
| <b><i>Pomacentrus coelestis</i></b>            | <b>Omnivore</b>               |
| <b><i>Pomacentrus lepidogenys</i></b>          | <b>Omnivore</b>               |
| <b><i>Pomacentrus moluccensis</i></b>          | <b>Omnivore</b>               |
| <b><i>Pomacentrus nagasakiensis</i></b>        | <b>Omnivore</b>               |
| <b><i>Pomacentrus pavo</i></b>                 | <b>Herbivore</b>              |
| <b><i>Pomacentrus wardi</i></b>                | <b>Herbivore</b>              |
| <b><i>Abudefduf</i> spp. (Pomacentridae)</b>   | <b>Omnivore</b>               |
| <i>Abudefduf bengalensis</i>                   | Omnivore                      |
| <i>Abudefduf septemfasciatus</i>               | Omnivore                      |
| <i>Abudefduf sexfasciatus</i>                  | Omnivore                      |
| <i>Abudefduf sordidus</i>                      | Omnivore                      |
| <i>Abudefduf whitleyi</i>                      | Omnivore                      |
| <b><i>Chromis</i> spp. (Pomacentridae)</b>     | <b>Omnivore</b>               |
| <i>Chromis atripectoralis</i>                  | Omnivore                      |
| <i>Chromis atripes</i>                         | Omnivore                      |
| <i>Chromis lepidolepis</i>                     | Omnivore                      |
| <i>Chromis margaritifer</i>                    | Omnivore                      |
| <i>Chromis retrofasciata</i>                   | Omnivore                      |
| <i>Chromis ternatensis</i>                     | Omnivore                      |
| <i>Chromis vanderbilti</i>                     | Omnivore                      |
| <i>Chromis viridis</i>                         | Omnivore                      |
| <i>Chromis weberi</i>                          | Omnivore                      |
| <i>Chromis xanthura</i>                        | Omnivore                      |
| <b><i>Chrysiptera</i> spp. (Pomacentridae)</b> | <b>Omnivore</b>               |
| <i>Chrysiptera brownriggii</i>                 | Herbivore                     |
| <i>Chrysiptera caesifrons</i>                  |                               |

|                                                   |                  |
|---------------------------------------------------|------------------|
| <i>Chrysiptera cyanea</i>                         | Omnivore         |
| <i>Chrysiptera flavipinnis</i>                    | Omnivore         |
| <i>Chrysiptera rollandi</i>                       | Omnivore         |
| <i>Chrysiptera talboti</i>                        | Omnivore         |
| <b><i>Dascyllus</i> spp. (Pomacentridae)</b>      | <b>Omnivore</b>  |
| <i>Dascyllus aruanus</i>                          | Omnivore         |
| <i>Dascyllus reticulatus</i>                      | Omnivore         |
| <i>Dascyllus trimaculatus</i>                     | Omnivore         |
| <b><i>Dischistodus</i> spp. (Pomacentridae)</b>   | <b>Herbivore</b> |
| <i>Dischistodus melanotus</i>                     | Herbivore        |
| <i>Dischistodus perspicillatus</i>                | Herbivore        |
| <i>Dischistodus prosopotaenia</i>                 | Herbivore        |
| <i>Dischistodus pseudochrysopoecilus</i>          | Herbivore        |
| <b><i>Neopomacentrus</i> spp. (Pomacentridae)</b> | <b>Omnivore</b>  |
| <i>Neopomacentrus azysron</i>                     | Omnivore         |
| <i>Neopomacentrus cyanomos</i>                    | Omnivore         |
| <b><i>Stegastes</i> spp. (Pomacentridae)</b>      | <b>Herbivore</b> |
| <i>Stegastes apicalis</i>                         | Herbivore        |
| <i>Stegastes nigricans</i>                        | Herbivore        |
| <i>Stegastes punctatus</i>                        | Herbivore        |
| <b>Acanthuridae</b>                               | <b>Herbivore</b> |
| <i>Acanthurus albipectoralis</i>                  | Omnivore         |
| <i>Acanthurus blochii</i>                         | Herbivore        |
| <i>Acanthurus dussumieri</i>                      | Herbivore        |
| <i>Acanthurus grammoptilus</i>                    | Herbivore        |
| <i>Acanthurus lineatus</i>                        | Herbivore        |
| <i>Acanthurus mata</i>                            | Omnivore         |
| <i>Acanthurus nigricans</i>                       | Herbivore        |
| <i>Acanthurus nigricauda</i>                      | Herbivore        |
| <i>Acanthurus nigrofuscus</i>                     | Herbivore        |
| <i>Acanthurus olivaceus</i>                       | Herbivore        |
| <i>Acanthurus pyroferus</i>                       | Herbivore        |
| <i>Acanthurus triostegus</i>                      | Herbivore        |
| <i>Acanthurus xanthopterus</i>                    | Herbivore        |
| <i>Ctenochaetus binotatus</i>                     | Herbivore        |
| <i>Ctenochaetus cyanocheilus</i>                  | Herbivore        |

|                                       |                 |
|---------------------------------------|-----------------|
| <i>Ctenochaetus striatus</i>          | Herbivore       |
| <i>Naso annulatus</i>                 | Omnivore        |
| <i>Naso brevirostris</i>              | Herbivore       |
| <i>Naso hexacanthus</i>               | Omnivore        |
| <i>Naso lituratus</i>                 | Herbivore       |
| <i>Naso tonganus</i>                  | Herbivore       |
| <i>Naso unicornis</i>                 | Herbivore       |
| <i>Naso vlamingii</i>                 | Omnivore        |
| <i>Paracanthurus hepatus</i>          | Omnivore        |
| <i>Zebrasoma scopas</i>               | Herbivore       |
| <i>Zebrasoma veliferum</i>            | Herbivore       |
| <b>Apogonidae</b>                     | <b>Omnivore</b> |
| <i>Apogon doederleini</i>             | Omnivore        |
| <i>Cheilodipterus artus</i>           | Omnivore        |
| <i>Cheilodipterus intermedius</i>     |                 |
| <i>Cheilodipterus macrodon</i>        | Omnivore        |
| <i>Cheilodipterus quinquelineatus</i> | Omnivore        |
| <i>Fibramia lateralis</i>             | Omnivore        |
| <i>Fibramia thermalis</i>             |                 |
| <i>Fowleria marmorata</i>             |                 |
| <i>Fowleria vaiulae</i>               | Omnivore        |
| <i>Nectamia fusca</i>                 | Omnivore        |
| <i>Ostorhinchus aureus</i>            | Omnivore        |
| <i>Ostorhinchus compressus</i>        | Omnivore        |
| <i>Ostorhinchus cookii</i>            | Omnivore        |
| <i>Ostorhinchus cyanosoma</i>         | Omnivore        |
| <i>Ostorhinchus hoevenii</i>          |                 |
| <i>Ostorhinchus neotes</i>            |                 |
| <i>Ostorhinchus nigrofasciatus</i>    | Omnivore        |
| <i>Ostorhinchus properuptus</i>       |                 |
| <i>Ostorhinchus rubrimacula</i>       |                 |
| <i>Pristiapogon exostigma</i>         | Omnivore        |
| <i>Pristiapogon fraenatus</i>         | Omnivore        |
| <i>Pristiapogon kallopterus</i>       | Omnivore        |
| <i>Pristicon trimaculatus</i>         | Omnivore        |
| <i>Rhabdamia gracilis</i>             | Omnivore        |
| <i>Siphamia tubifer</i>               | Omnivore        |
| <i>Sphaeramia nematoptera</i>         | Omnivore        |
| <i>Taeniamia biguttata</i>            |                 |
| <i>Taeniamia fucata</i>               | Omnivore        |

|                                         |                  |
|-----------------------------------------|------------------|
| <i>Taeniamia zosterophora</i>           | Omnivore         |
| <i>Zoramia leptacanthus</i>             | Omnivore         |
| <i>Zoramia viridiventer</i>             |                  |
| <b>Balistidae</b>                       | <b>Omnivore</b>  |
| <i>Abalistes stellatus</i>              |                  |
| <i>Balistapus undulatus</i>             | Omnivore         |
| <i>Balistoides conspicillum</i>         | Omnivore         |
| <i>Balistoides viridescens</i>          | Omnivore         |
| <i>Melichthys vidua</i>                 | Omnivore         |
| <i>Odonus niger</i>                     | Omnivore         |
| <i>Pseudobalistes flavimarginatus</i>   | Omnivore         |
| <i>Pseudobalistes fuscus</i>            | Omnivore         |
| <i>Rhinecanthus aculeatus</i>           | Omnivore         |
| <i>Rhinecanthus rectangulus</i>         | Omnivore         |
| <i>Rhinecanthus verrucosus</i>          |                  |
| <i>Sufflamen bursa</i>                  | Omnivore         |
| <i>Sufflamen chrysopterum</i>           | Omnivore         |
| <i>Sufflamen fraenatum</i>              | Omnivore         |
| <b>Blenniidae (subfamily: Salariae)</b> | <b>Herbivore</b> |
| <i>Blenniella chrysoopilus</i>          | Herbivore        |
| <i>Cirripectes castaneus</i>            | Herbivore        |
| <i>Cirripectes stigmaticus</i>          | Herbivore        |
| <i>Crossosalarias macrospilus</i>       |                  |
| <i>Ecsenius australianus</i>            | Herbivore        |
| <i>Ecsenius bicolor</i>                 | Herbivore        |
| <i>Ecsenius mandibularis</i>            | Herbivore        |
| <i>Ecsenius stictus</i>                 | Omnivore         |
| <i>Exallias brevis</i>                  | Herbivore        |
| <i>Istiblennius edentulus</i>           | Herbivore        |
| <i>Nannosalarias nativitatis</i>        | Herbivore        |
| <i>Salarias alboguttatus</i>            | Herbivore        |
| <i>Salarias fasciatus</i>               | Herbivore        |
| <b>Carangidae</b>                       | <b>Carnivore</b> |
| <i>Atule mate</i>                       | Carnivore        |
| <i>Carangoides bajad</i>                | Carnivore        |
| <i>Carangoides ferdau</i>               | Carnivore        |
| <i>Carangoides fulvoguttatus</i>        | Carnivore        |
| <i>Carangoides gymnostethus</i>         | Carnivore        |

|                                 |                 |
|---------------------------------|-----------------|
| <i>Carangoides plagiotaenia</i> | Carnivore       |
| <i>Caranx ignobilis</i>         | Carnivore       |
| <i>Caranx lugubris</i>          | Carnivore       |
| <i>Caranx melampygus</i>        | Carnivore       |
| <i>Caranx papuensis</i>         | Carnivore       |
| <i>Caranx sexfasciatus</i>      | Carnivore       |
| <i>Elagatis bipinnulata</i>     | Carnivore       |
| <i>Gnathanodon speciosus</i>    | Carnivore       |
| <i>Scomberoides lysan</i>       | Carnivore       |
| <i>Trachinotus bailloni</i>     | Carnivore       |
| <i>Trachinotus blochii</i>      | Omnivore        |
| <i>Ulua mentalis</i>            | Carnivore       |
| <i>Uraspis uraspis</i>          | Carnivore       |
| <b>Chaetodonidae</b>            | <b>Omnivore</b> |
| <i>Chaetodon aureofasciatus</i> | Omnivore        |
| <i>Chaetodon auriga</i>         | Omnivore        |
| <i>Chaetodon baronessa</i>      | Omnivore        |
| <i>Chaetodon bennetti</i>       | Omnivore        |
| <i>Chaetodon citrinellus</i>    | Omnivore        |
| <i>Chaetodon ephippium</i>      | Omnivore        |
| <i>Chaetodon flavirostris</i>   | Omnivore        |
| <i>Chaetodon kleinii</i>        | Omnivore        |
| <i>Chaetodon lineolatus</i>     | Omnivore        |
| <i>Chaetodon lunula</i>         | Omnivore        |
| <i>Chaetodon lunulatus</i>      | Omnivore        |
| <i>Chaetodon melannotus</i>     | Omnivore        |
| <i>Chaetodon mertensii</i>      | Omnivore        |
| <i>Chaetodon meyeri</i>         | Omnivore        |
| <i>Chaetodon ornatissimus</i>   | Omnivore        |
| <i>Chaetodon pelewensis</i>     | Omnivore        |
| <i>Chaetodon plebeius</i>       | Omnivore        |
| <i>Chaetodon rafflesii</i>      | Omnivore        |
| <i>Chaetodon rainfordi</i>      | Omnivore        |
| <i>Chaetodon reticulatus</i>    | Omnivore        |
| <i>Chaetodon semeion</i>        | Omnivore        |
| <i>Chaetodon speculum</i>       | Omnivore        |
| <i>Chaetodon trifascialis</i>   | Omnivore        |
| <i>Chaetodon ulietensis</i>     | Omnivore        |
| <i>Chaetodon unimaculatus</i>   | Omnivore        |
| <i>Chaetodon vagabundus</i>     | Omnivore        |

|                                    |                 |
|------------------------------------|-----------------|
| <i>Chelmon rostratus</i>           | Omnivore        |
| <i>Coradion chrysozonus</i>        | Omnivore        |
| <i>Forcipiger longirostris</i>     | Omnivore        |
| <i>Hemitaurichthys polylepis</i>   | Omnivore        |
| <i>Heniochus acuminatus</i>        | Omnivore        |
| <i>Heniochus chrysostomus</i>      | Omnivore        |
| <i>Heniochus diphreutes</i>        | Omnivore        |
| <i>Heniochus monoceros</i>         | Omnivore        |
| <i>Heniochus singularius</i>       | Omnivore        |
| <i>Heniochus varius</i>            | Omnivore        |
| <b>Gobiidae</b>                    | <b>Omnivore</b> |
| <i>Amblyeleotris guttata</i>       |                 |
| <i>Amblyeleotris steinitzi</i>     |                 |
| <i>Amblyeleotris wheeleri</i>      |                 |
| <i>Amblygobius decussatus</i>      | Omnivore        |
| <i>Amblygobius nocturnus</i>       | Omnivore        |
| <i>Amblygobius phalaena</i>        | Omnivore        |
| <i>Amblygobius sphynx</i>          |                 |
| <i>Asterropteryx semipunctata</i>  | Omnivore        |
| <i>Bryaninops amplus</i>           |                 |
| <i>Bryaninops loki</i>             |                 |
| <i>Bryaninops yongei</i>           | Omnivore        |
| <i>Cryptocentrus cinctus</i>       |                 |
| <i>Cryptocentrus leptocephalus</i> |                 |
| <i>Cryptocentrus strigilliceus</i> |                 |
| <i>Ctenogobiops maculosus</i>      |                 |
| <i>Ctenogobiops mitodes</i>        |                 |
| <i>Ctenogobiops pomastictus</i>    | Omnivore        |
| <i>Eviota atriventris</i>          |                 |
| <i>Eviota bifasciata</i>           |                 |
| <i>Eviota prasites</i>             |                 |
| <i>Fusigobius duospilus</i>        | Omnivore        |
| <i>Fusigobius inframaculatus</i>   |                 |
| <i>Fusigobius melacron</i>         |                 |
| <i>Fusigobius neophytus</i>        | Omnivore        |
| <i>Fusigobius signipinnis</i>      |                 |
| <i>Gnatholepis cauerensis</i>      | Omnivore        |
| <i>Gobiodon aoyagii</i>            |                 |
| <i>Gobiodon axillaris</i>          |                 |
| <i>Gobiodon brochus</i>            | Omnivore        |

|                                   |                 |
|-----------------------------------|-----------------|
| <i>Gobiodon citrinus</i>          | Omnivore        |
| <i>Gobiodon erythrospilus</i>     | Omnivore        |
| <i>Gobiodon heterospilos</i>      |                 |
| <i>Gobiodon histrio</i>           |                 |
| <i>Gobiodon okinawae</i>          |                 |
| <i>Gobiodon quinquestrigatus</i>  | Omnivore        |
| <i>Istigobius decoratus</i>       |                 |
| <i>Istigobius ornatus</i>         | Omnivore        |
| <i>Istigobius rigilius</i>        |                 |
| <i>Koumansetta rainfordi</i>      |                 |
| <i>Mahidolia mystacina</i>        | Omnivore        |
| <i>Pleurosicya micheli</i>        |                 |
| <i>Pleurosicya mossambica</i>     |                 |
| <i>Signigobius biocellatus</i>    | Omnivore        |
| <i>Trimma benjamini</i>           |                 |
| <i>Trimma lantana</i>             |                 |
| <i>Trimma striatum</i>            |                 |
| <i>Valenciennesa longipinnis</i>  | Omnivore        |
| <i>Valenciennesa parva</i>        |                 |
| <i>Valenciennesa puellaris</i>    |                 |
| <i>Valenciennesa strigata</i>     | Omnivore        |
| <i>Vanderhorstia ambanoro</i>     |                 |
| <b>Labridae</b>                   | <b>Omnivore</b> |
| <i>Anampses caeruleopunctatus</i> | Omnivore        |
| <i>Anampses neoguinaicus</i>      | Omnivore        |
| <i>Bodianus axillaris</i>         | Omnivore        |
| <i>Bodianus dictynna</i>          | Omnivore        |
| <i>Bodianus loxozonus</i>         | Omnivore        |
| <i>Bodianus mesothorax</i>        | Omnivore        |
| <i>Cheilinus chlorourus</i>       | Omnivore        |
| <i>Cheilinus fasciatus</i>        | Omnivore        |
| <i>Cheilinus trilobatus</i>       | Omnivore        |
| <i>Cheilinus undulatus</i>        | Omnivore        |
| <i>Cheilio inermis</i>            | Omnivore        |
| <i>Choerodon anchorago</i>        | Omnivore        |
| <i>Choerodon fasciatus</i>        | Omnivore        |
| <i>Choerodon jordani</i>          | Omnivore        |
| <i>Choerodon schoenleinii</i>     | Omnivore        |
| <i>Cirrhilabrus laboutei</i>      | Omnivore        |
| <i>Cirrhilabrus punctatus</i>     | Omnivore        |

|                                     |           |
|-------------------------------------|-----------|
| <i>Cirrhilabrus scottorum</i>       | Omnivore  |
| <i>Coris aygula</i>                 | Omnivore  |
| <i>Coris batuensis</i>              | Omnivore  |
| <i>Coris gaimard</i>                | Omnivore  |
| <i>Coris pictoides</i>              | Omnivore  |
| <i>Epibulus insidiator</i>          | Carnivore |
| <i>Gomphosus varius</i>             | Omnivore  |
| <i>Halichoeres biocellatus</i>      | Omnivore  |
| <i>Halichoeres chloropterus</i>     | Omnivore  |
| <i>Halichoeres chrysus</i>          | Omnivore  |
| <i>Halichoeres hortulanus</i>       | Omnivore  |
| <i>Halichoeres marginatus</i>       | Omnivore  |
| <i>Halichoeres melanurus</i>        | Omnivore  |
| <i>Halichoeres nebulosus</i>        | Omnivore  |
| <i>Halichoeres prosopeion</i>       | Omnivore  |
| <i>Halichoeres trimaculatus</i>     | Omnivore  |
| <i>Hemigymnus fasciatus</i>         | Omnivore  |
| <i>Hemigymnus melapterus</i>        | Omnivore  |
| <i>Hologymnosus annulatus</i>       | Carnivore |
| <i>Hologymnosus doliatus</i>        | Carnivore |
| <i>Iniistius pavo</i>               | Omnivore  |
| <i>Labrichthys unilineatus</i>      | Omnivore  |
| <i>Labroides bicolor</i>            | Omnivore  |
| <i>Labroides dimidiatus</i>         | Omnivore  |
| <i>Labropsis australis</i>          | Omnivore  |
| <i>Macropharyngodon meleagris</i>   | Omnivore  |
| <i>Macropharyngodon negrosensis</i> | Omnivore  |
| <i>Novaculichthys taeniourus</i>    | Omnivore  |
| <i>Oxycheilinus digramma</i>        | Carnivore |
| <i>Oxycheilinus orientalis</i>      | Carnivore |
| <i>Pseudocheilinus hexataenia</i>   | Omnivore  |
| <i>Pseudocoris yamashiroi</i>       | Omnivore  |
| <i>Pteragogus cryptus</i>           | Omnivore  |
| <i>Stethojulis bandanensis</i>      | Omnivore  |
| <i>Stethojulis strigiventer</i>     | Omnivore  |
| <i>Stethojulis trilineata</i>       | Omnivore  |
| <i>Thalassoma amblycephalum</i>     | Omnivore  |
| <i>Thalassoma hardwicke</i>         | Omnivore  |
| <i>Thalassoma janseni</i>           | Omnivore  |
| <i>Thalassoma lunare</i>            | Omnivore  |
| <i>Thalassoma lutescens</i>         | Omnivore  |

|                                   |                  |
|-----------------------------------|------------------|
| <i>Thalassoma quinquevittatum</i> | Omnivore         |
| <b>Lethrinidae</b>                | <b>Carnivore</b> |
| <i>Gnathodentex aureolineatus</i> | Carnivore        |
| <i>Gymnocranius microdon</i>      | Carnivore        |
| <i>Lethrinus atkinsoni</i>        | Carnivore        |
| <i>Lethrinus erythracanthus</i>   | Omnivore         |
| <i>Lethrinus harak</i>            | Carnivore        |
| <i>Lethrinus lentjan</i>          | Carnivore        |
| <i>Lethrinus nebulosus</i>        | Omnivore         |
| <i>Lethrinus obsoletus</i>        | Omnivore         |
| <i>Lethrinus olivaceus</i>        | Carnivore        |
| <i>Monotaxis grandoculis</i>      | Omnivore         |
| <i>Monotaxis heterodon</i>        |                  |
| <b>Lutjanidae</b>                 | <b>Carnivore</b> |
| <i>Aphareus furca</i>             | Carnivore        |
| <i>Aprion virescens</i>           | Carnivore        |
| <i>Lutjanus argentimaculatus</i>  | Carnivore        |
| <i>Lutjanus biguttatus</i>        | Carnivore        |
| <i>Lutjanus bohar</i>             | Carnivore        |
| <i>Lutjanus carponotatus</i>      | Omnivore         |
| <i>Lutjanus fulviflamma</i>       | Carnivore        |
| <i>Lutjanus fulvus</i>            | Carnivore        |
| <i>Lutjanus gibbus</i>            | Carnivore        |
| <i>Lutjanus kasmira</i>           | Carnivore        |
| <i>Lutjanus lutjanus</i>          | Carnivore        |
| <i>Lutjanus monostigma</i>        | Carnivore        |
| <i>Lutjanus quinquelineatus</i>   | Omnivore         |
| <i>Lutjanus rivulatus</i>         | Carnivore        |
| <i>Lutjanus russellii</i>         | Carnivore        |
| <i>Lutjanus sebae</i>             | Carnivore        |
| <i>Lutjanus semicinctus</i>       | Carnivore        |
| <i>Lutjanus vitta</i>             | Carnivore        |
| <i>Macolor macularis</i>          | Omnivore         |
| <i>Macolor niger</i>              | Carnivore        |
| <i>Symphorichthys spilurus</i>    | Carnivore        |
| <i>Symphorus nematophorus</i>     | Carnivore        |
| <b>Monacanthidae</b>              | <b>Omnivore</b>  |
| <i>Aluterus scriptus</i>          | Omnivore         |

|                                             |                  |
|---------------------------------------------|------------------|
| <i>Cantherhines dumerili</i>                | Omnivore         |
| <i>Oxymonacanthus longirostris</i>          | Omnivore         |
| <i>Paraluteres prionurus</i>                | Omnivore         |
| <b>Nemipteridae</b>                         | <b>Omnivore</b>  |
| <i>Scolopsis bilineata</i>                  | Omnivore         |
| <i>Scolopsis lineata</i>                    | Omnivore         |
| <i>Scolopsis margaritifera</i>              | Omnivore         |
| <i>Scolopsis trilineata</i>                 |                  |
| <i>Scolopsis monogramma</i>                 | Omnivore         |
| <i>Pentapodus aureofasciatus</i>            |                  |
| <b>Pinguipedidae</b>                        | <b>Omnivore</b>  |
| <i>Parapercis australis</i>                 |                  |
| <i>Parapercis clathrata</i>                 | Omnivore         |
| <i>Parapercis lineopunctata</i>             |                  |
| <i>Parapercis queenslandica</i>             |                  |
| <i>Parapercis snyderi</i>                   |                  |
| <i>Parapercis xanthozona</i>                |                  |
| <b>Pseudochromidae</b>                      | <b>Carnivore</b> |
| <i>Cypho purpurascens</i>                   |                  |
| <i>Ogilbyina queenslandiae</i>              |                  |
| <i>Oxycercichthys veliferus</i>             |                  |
| <i>Pictichromis paccagnellae</i>            | Carnivore        |
| <i>Pseudochromis fuscus</i>                 | Carnivore        |
| <b>Serranidae (subfamily Epinephelinae)</b> | <b>Carnivore</b> |
| <i>Aethaloperca rogae</i>                   | Carnivore        |
| <i>Anyperodon leucogrammicus</i>            | Carnivore        |
| <i>Cephalopholis argus</i>                  | Carnivore        |
| <i>Cephalopholis boenak</i>                 | Omnivore         |
| <i>Cephalopholis cyanostigma</i>            | Omnivore         |
| <i>Cephalopholis microprion</i>             | Carnivore        |
| <i>Cephalopholis miniata</i>                | Carnivore        |
| <i>Cephalopholis sexmaculata</i>            | Carnivore        |
| <i>Cephalopholis spiloparaea</i>            | Carnivore        |
| <i>Cephalopholis urodeta</i>                | Carnivore        |
| <i>Cromileptes altivelis</i>                | Carnivore        |
| <i>Epinephelus coeruleopunctatus</i>        | Carnivore        |
| <i>Epinephelus corallicola</i>              |                  |

|                                      |                  |
|--------------------------------------|------------------|
| <i>Epinephelus cyanopodus</i>        | Carnivore        |
| <i>Epinephelus fasciatus</i>         | Carnivore        |
| <i>Epinephelus fuscoguttatus</i>     | Carnivore        |
| <i>Epinephelus hexagonatus</i>       | Carnivore        |
| <i>Epinephelus lanceolatus</i>       | Carnivore        |
| <i>Epinephelus maculatus</i>         | Carnivore        |
| <i>Epinephelus malabaricus</i>       | Carnivore        |
| <i>Epinephelus merra</i>             | Carnivore        |
| <i>Epinephelus ongus</i>             | Carnivore        |
| <i>Epinephelus polyphekadion</i>     | Carnivore        |
| <i>Epinephelus quoyanus</i>          | Carnivore        |
| <i>Epinephelus tauvina</i>           | Carnivore        |
| <i>Epinephelus tukula</i>            | Carnivore        |
| <i>Plectropomus areolatus</i>        | Carnivore        |
| <i>Plectropomus laevis</i>           | Carnivore        |
| <i>Plectropomus leopardus</i>        | Carnivore        |
| <i>Plectropomus maculatus</i>        | Carnivore        |
| <i>Variola albimarginata</i>         | Carnivore        |
| <i>Variola louti</i>                 | Carnivore        |
| <b>Siganidae</b>                     | <b>Herbivore</b> |
| <i>Siganus argenteus</i>             | Herbivore        |
| <i>Siganus corallinus</i>            | Herbivore        |
| <i>Siganus doliatus</i>              | Herbivore        |
| <i>Siganus lineatus</i>              | Herbivore        |
| <i>Siganus puellus</i>               | Herbivore        |
| <i>Siganus punctatissimus</i>        | Herbivore        |
| <i>Siganus punctatus</i>             | Herbivore        |
| <i>Siganus spinus</i>                | Herbivore        |
| <i>Siganus vulpinus</i>              | Herbivore        |
| <b>Sphyraenidae</b>                  | <b>Carnivore</b> |
| <i>Sphyraena barracuda</i>           | Carnivore        |
| <i>Sphyraena obtusata</i>            | Carnivore        |
| <i>Sphyraena qenie</i>               | Carnivore        |
| <i>Sphyraena jello</i>               | Carnivore        |
| <b>Syngnathidae</b>                  | <b>Omnivore</b>  |
| <i>Corythoichthys conspicillatus</i> | Omnivore         |
| <i>Corythoichthys intestinalis</i>   | Omnivore         |
| <i>Corythoichthys ocellatus</i>      |                  |

|                                   |                 |
|-----------------------------------|-----------------|
| <i>Corythoichthys schultzi</i>    | Omnivore        |
| <i>Hippocampus taeniopterus</i>   | Omnivore        |
| <b>Tetraodontidae</b>             | <b>Omnivore</b> |
| <i>Arothron caeruleopunctatus</i> |                 |
| <i>Arothron hispidus</i>          | Omnivore        |
| <i>Arothron mappa</i>             | Omnivore        |
| <i>Arothron nigropunctatus</i>    | Omnivore        |
| <i>Arothron stellatus</i>         | Omnivore        |
| <i>Canthigaster bennetti</i>      | Omnivore        |
| <i>Canthigaster papua</i>         |                 |
| <i>Canthigaster valentini</i>     | Omnivore        |
| <i>Feroxodon multistriatus</i>    | Omnivore        |

7
